# Supplementary material for: A Systematic Review and Meta-analysis of Recovery Educational Interventions for Mental Health Professionals
Source: Springer Nature journal article supplement (doi:10.1007/s10488-019-00956-9), 2019-07-23
Supplement: MOESM1 [file 16973578]

Id;Studyid;Name;Yearofstudy;Level;Outcomevalence;Outcome;Instrument;Design;Mean1;SD1;Total1;Mean2;SD2;Total2;TypeIntervention;Profession;Durationofinterventiondays;Durationofinterventionhours;Timefrompretopostdays;ACTIVEwomen;GENDER;CONTROLwomen;ACTIVE_age;AGE;Yearsinmentalhealth(mean);QATQSScore
1;1;Chen et al. 2014;2014;Individual;Positive;Knowledge;Recovery Knowledge Inventory;Non randomised;4	05;0	49;23	00;3	87;0	41;23	00;Own design course (self learning + groups);Inpatient units staff;Not reported (6 weeks for group	n=7);12;;84	60;Y;84	60;;N;11	81;3
2;2;Crowe et al. 2006 (Gov);2006;Individual;Positive_part;Attitudes_part;Recovery Attitudes Questionnaire (RAQ-7);Non randomised;15	19;1	75;147	00;14	52;1	92;147	00;Collaborative Recovery Training Program (CRTP);Government;2;8;2;70	00;Y;70	00;40	91;Y;12	01;3
3;2;Crowe et al. 2006 (Gov);2006;Individual;Positive_part;Attitudes_part;Staff Attitudes to Recovery Scale (STARS);Non randomised;73	80;7	44;147	00;67	96;8	07;147	00;Collaborative Recovery Training Program (CRTP);Government;2;8;2;70	00;Y;70	00;40	91;Y;12	01;3
4;2;Crowe et al. 2006 (Gov);2006;Individual;Positive;Attitudes;Attitudes composite;Non randomised;44	495;4	225993966;147	00;41	24;4	590906773;147	00;Collaborative Recovery Training Program (CRTP);Government;2;8;2;70	00;Y;70	00;40	91;Y;12	01;3
5;2;Crowe et al. 2006 (Gov);2006;Individual;Positive;Knowledge;Collaborative Recovery Knowledge Scale;Non randomised;8	69;2	33;101	00;7	32;1	98;101	00;Collaborative Recovery Training Program (CRTP);Nongoverment;2;8;2;70	00;Y;70	00;40	91;Y;12	01;3
6;2;Crowe et al. 2006 (Nongov);2006;Individual;Positive_part;Attitudes_part;Recovery Attitudes Questionnaire (RAQ-7);Non randomised;15	19;2	90;101	00;15	06;1	75;101	00;Collaborative Recovery Training Program (CRTP);Nongoverment;2;8;2;70	00;Y;70	00;40	91;Y;12	01;3
7;2;Crowe et al. 2006 (Nongov);2006;Individual;Positive_part;Attitudes_part;Staff Attitudes to Recovery Scale (STARS);Non randomised;71	01;9	86;101	00;66	83;9	87;101	00;Collaborative Recovery Training Program (CRTP);Nongoverment;2;8;2;70	00;Y;70	00;40	91;Y;12	01;3
8;2;Crowe et al. 2006 (Nongov);2006;Individual;Positive;Attitudes;Attitudes composite;Non randomised;43	1;5	792745463;101	00;40	945;5	425677377;101	00;Collaborative Recovery Training Program (CRTP);Nongoverment;2;8;2;70	00;Y;70	00;40	91;Y;12	01;3
9;2;Crowe et al. 2006 (Nongov);2006;Individual;Positive;Knowledge;Collaborative Recovery Knowledge Scale;Non randomised;9	39;1	72;147	00;7	54;1	99;147	00;Collaborative Recovery Training Program (CRTP);Government;2;8;2;70	00;Y;70	00;40	91;Y;12	01;3
10;3;Deane et al.	2018;2018;Individual;Positive;Knowledge;Recovery Knowledge Inventory;Non randomised;4	19;51	00;73	00;3	91;0	54;73	00;Strenghs Model;Mental health staff;2 + Grupos de supervisión por 6 meses?;8;2;74	00;Y;74	00;41	24;Y;41	24;2
11;3;Deane et al.	2018;2018;Individual;Positive_part;Attitudes_part;Therapeutic Optimism Scale (TOS);Non randomised;4	35;0	45;73	00;4	14;0	45;73	00;Strenghs Model;Mental health staff;2 + Grupos de supervisión por 6 meses?;8;2;74	00;Y;74	00;41	24;Y;41	24;2
12;3;Deane et al.	2018;2018;Individual;Positive_part;Attitudes_part;Recovery Attitudes Questionnaire (RAQ-7);Non randomised;4	44;0	45;73	00;4	26;0	42;73	00;Strenghs Model;Mental health staff;2 + Grupos de supervisión por 6 meses?;8;2;74	00;Y;74	00;41	24;Y;41	24;2
13;3;Deane et al.	2018;2018;Individual;Positive_part;Attitudes_part;Perceived Risk Questionnaire (PRQ);Non randomised;2	94;0	81;73	00;2	34;0	76;73	00;Strenghs Model;Mental health staff;2 + Grupos de supervisión por 6 meses?;8;2;74	00;Y;74	00;41	24;Y;41	24;2
14;3;Deane et al.	2018;2018;Individual;Positive_part;Attitudes_part;Strengths Model Attitudes Questionnaire (SMAQ);Non randomised;4	19;0	53;73	00;4	00;0	58;73	00;Strenghs Model;Mental health staff;2 + Grupos de supervisión por 6 meses?;8;2;74	00;Y;74	00;41	24;Y;41	24;2
15;3;Deane et al.	2018;2018;Individual;Positive;Attitudes;Attitudes composite;Non randomised;3	98;0	375907236;73	00;3	685;0	370025337;73	00;Strenghs Model;Mental health staff;2 + Grupos de supervisión por 6 meses?;8;2;74	00;Y;74	00;41	24;Y;41	24;2
16;3;Deane et al.	2018;2018;Individual;Positive;Practice;Strengths Model Skills Survey (SMSS);Non randomised;4	06;0	54;41	00;3	78;0	51;41	00;Strenghs Model;Mental health staff;2 + Grupos de supervisión por 6 meses?;20;180;74	00;Y;74	00;41	24;Y;41	24;2
17;4;Killaspy et al. 2015;2015;Team;Positive_out;Human rights_team;Quality Indicator for Rehabilitative Care (QuIRC);RCT;75	00;6	00;19	00;71	00;7	00;20	00;GetReal;Team manager;35;288;365;;N;;;N;;1
18;4;Killaspy et al. 2015;2015;Team;Positive;Practice;Quality Indicator for Rehabilitative Care (QuIRC);RCT;69	00;7	00;19	00;68	00;7	00;20	00;GetReal;Team manager;35;288;365;;N;;;N;;1
19;4;Killaspy et al. 2015;2015;Team;Positive_out;Self-management and autonomy_team;Quality Indicator for Rehabilitative Care (QuIRC);RCT;71	00;6	00;19	00;70	00;7	00;29	00;GetReal;Team manager;35;288;365;;N;;;N;;1
20;4;Killaspy et al. 2015;2015;Team;Positive_out;Social inclusion_team;Quality Indicator for Rehabilitative Care (QuIRC);RCT;65	00;10	00;19	00;62	00;13	00;20	00;GetReal;Team manager;35;288;365;;N;;;N;;1
21;4;Killaspy et al. 2015;2015;Team;Positive;Attitudes;Quality Indicator for Rehabilitative Care (QuIRC);RCT;67	00;5	00;19	00;66	00;6	00;20	00;GetReal;Team manager;35;288;365;;N;;;N;;1
22;4;Killaspy et al. 2015;2015;Team;Positive_out;Treatments and Interventions_team;Quality Indicator for Rehabilitative Care (QuIRC);RCT;65	00;6	00;19	00;62	00;7	00;20	00;GetReal;Team manager;35;288;365;;N;;;N;;1
23;4;Killaspy et al. 2015 (team level);2015;Team;Positive_out;Living Environment_team;Quality Indicator for Rehabilitative Care (QuIRC);RCT;73	00;9	00;19	00;73	00;9	00;20	00;GetReal;Team manager;35;288;365;;N;;;N;;1
24;5;Meehan et al. 2009;2009;Individual;Positive;Knowledge;Recovery Knowledge Inventory;Non randomised;3	89;0	49;114	00;3	21;0	88;64	00;Own design course;Mental health staff;3;12;180;;N;NR;;N;;2
25;6;Peebles et al. 2009;2009;Individual;Negative_out;Attitudes to stigma;Attribution Questionnaire AQ-27;Non randomised;-94	78;17	66;35	00;-98	89;14	85;33	00;Own design course (GREAT);Psychiatrists and psychologists;0	21 (5h en dos dias);5;90;50	00;Y;50	00;;N;;3
26;6;Peebles et al. 2009;2009;Individual;Positive;Attitudes;Recovery attitudinal Survey;Non randomised;136	80;11	56;33	00;117	03;10	03;34	00;Own design course (GREAT);Psychiatrists and psychologists;0	21 (5h en dos dias);5;90;50	00;Y;50	00;;N;;3
27;6;Peebles et al. 2009;2009;Individual;Positive_out;Knowledge_OUT;Recovery Knowledge Inventory (es el pre post del grupo intervención FUERA!!!);Non randomised;4	31;0	25;31	00;4	13;0	29;35	00;Own design course (GREAT);Psychiatrists and psychologists;0	21 (5h en dos dias);5;90;50	00;Y;50	00;;N;;3
28;6;Peebles et al. 2009;2009;Individual;Positive_part;Knowledge_part;Recovery Knowledge Inventory_outlier;Non randomised;4	25;0	28;32	00;3	14;0	43;34	00;Own design course (GREAT);Psychiatrists and psychologists;0	21 (5h en dos dias);5;90;50	00;Y;50	00;;N;;3
29;6;Peebles et al. 2009;2009;Individual;Positive_part;Knowledge_part;Project GREAT Recovery Knowledge Measure_outlier;Non randomised;20	21;3	48;32	00;14	88;3	98;34	00;Own design course (GREAT);Psychiatrists and psychologists;0	21 (5h en dos dias);5;90;50	00;Y;50	00;;N;;3
30;6;Peebles et al. 2009;2009;Individual;Positive;Knowledge;Knowledge composite;Non randomised;12	23;1	814056228;32	00;9	01;2	105748086;34	00;Own design course (GREAT);Psychiatrists and psychologists;0	21 (5h en dos dias);5;90;50	00;Y;50	00;;N;;3
31;7;Pollard et al. 2008;2008;Individual;Positive;Practice;Practitioners' Beliefs	Goals and Practices in Psychiatric Rehabilitation Questionnaire (PBGPPR) Recovery subscale;RCT;12	20;1	40;27	00;11	50;2	40;27	00;Own design course;Inpatient units staff;;36;;67	80;Y;59	20;44	10;Y;11	20;3
32;8;Repique et al. 2016;2016;Individual;Positive;Knowledge;Recovery Knowledge Inventory;Non randomised;3	47;0	70;31	00;3	44;0	74;41	00;SAMSHA;Mental health nurses inpatient unit;0	24;1;90;81	00;Y;81	00;43	00;Y;???;3
33;9;Salgado et al. 2010;2010;Individual;Positive_part;Attitudes_part;Recovery Attitudes Questionnaire (RAQ-7);Non randomised;4	41;0	45;75	00;3	95;0	40;75	00;CRTP;Mental health staff;2;8;2;65	50;Y;65	50;38	30;Y;7	58;2
34;9;Salgado et al. 2010;2010;Individual;Positive_part;Attitudes_part;Staff Attitudes to Recovery Scale (STARS);Non randomised;4	28;0	45;75	00;3	95;0	41;75	00;CRTP;Mental health staff;2;8;2;65	50;Y;65	50;38	30;Y;7	58;2
35;9;Salgado et al. 2010;2010;Individual;Positive_part;Attitudes_part;Therapeutic Optimism Scale (TOS);Non randomised;4	26;0	35;75	00;3	98;0	37;75	00;CRTP;Mental health staff;2;8;2;65	50;Y;65	50;38	30;Y;7	58;2
36;9;Salgado et al. 2010;2010;Individual;Positive;Attitudes;Attitudes composite;Non randomised;4	316666667;0	295569131;75	00;3	96;0	278258473;75	00;CRTP;Mental health staff;2;8;2;65	50;Y;65	50;38	30;Y;7	58;2
37;9;Salgado et al. 2010;2010;Individual;Positive;Knowledge;Recovery Knowledge Inventory;Non randomised;3	69;0	49;27	00;3	51;0	39;27	00;CRTP;Mental health staff;2;8;2;65	50;Y;65	50;38	30;Y;7	58;2
38;10;Slade et al. 2015;2015;Individual;Positive;Attitudes;MICA questionnaire;RCT;30	72;6	19;130	00;30	12;6	30;131	00;REFOCUS;Mental health staff;(3x4h + 8h + 4h) + groups (1 year);24;365;;N;;;N;;1
39;10;Slade et al. 2015;2015;Individual;Positive;Knowledge;Recovery Knowledge Inventory;RCT;2	93;0	33;128	00;2	92;0	34;129	00;REFOCUS;Mental health staff;(3x4h + 8h + 4h) + groups (1 year);24;365;;N;;;N;;1
40;10;Slade et al. 2015;2015;Individual;Positive;Practice_part;Skills;RCT;2	85;0	09;116	00;2	87;0	06;114	00;REFOCUS;Mental health staff;(3x4h + 8h + 4h) + groups (1 year);24;365;;N;;;N;;1
41;10;Slade et al. 2015;2015;Individual;Positive;Practice_part;Behavioural intent;RCT;1	64;0	05;116	00;1	67;0	03;114	00;REFOCUS;Mental health staff;(3x4h + 8h + 4h) + groups (1 year);24;365;;N;;;N;;1
42;10;Slade et al. 2015;2015;Individual;Positive;Practice_part;Behaviour;RCT;1	76;0	09;116	00;1	8;0	07;114	00;REFOCUS;Mental health staff;(3x4h + 8h + 4h) + groups (1 year);24;365;;N;;;N;;1
43;10;Slade et al. 2015;2015;Individual;Positive;Practice;Recovery Practice Scale (RPS) falta por calcular;RCT;2	08;0	05;116	00;2	11;0	04;114	00;REFOCUS;Mental health staff;(3x4h + 8h + 4h) + groups (1 year);24;365;;N;;;N;;1
44;11;Strating et al.	2012;2012;Team;Positive;Practice;Recovery Oriented Practices Index (ROPI);Non randomised;3	16;0	43;25	00;2	68;0	49;25	00;Own design;Team manager;1 year? It is not clear;100;365;62	00;Y;;;N;;3
51;12;Wilrycx et al. 2012;2012;Individual;Positive;Attitudes;Recovery Attitudes Questionnaire (RAQ-7);Non randomised;3	18;0	27;96	00;3	01;0	42;210	00;Own design course;Mental health staff;4;16;20;74	00;Y;74	00;43	30;Y;13	20;3
52;12;Wilrycx et al. 2012;2012;Individual;Positive;Knowledge;Recovery Knowledge Inventory;Non randomised;3	07;0	22;96	00;3	03;0	30;210	00;Own design course;Mental health staff;4;16;20;74	00;Y;74	00;43	30;Y;13	20;3
53;13;Young et al. 2005;2005;Individual;Positive;Practice;Competency Assessment Instrument (CAI);Non randomised;0	02;0	08;117	00;0	00;0	09;78	00;Own design course: Staff Supporting Skillss for Self-Help;Mental health staff;;50;365;69;Y;61;;N;;3
54;13;Young et al. 2005;2005;Individual;Positive;Attitudes;Recovery Attitudes Questionnaire (RAQ-7);Non randomised;0	04;0	12;117	00;0	00;0	12;78	00;Own design course: Staff Supporting Skillss for Self-Help;Mental health staff;;50;365;69;Y;61;;N;;3
55;14;Zuaboni et al. 2017;2017;Individual;Positive;Practice;Recovery Self Assessment Scale for practitioners;Non randomised;3	82;0	59;38	00;3	65;0	40;9	00;REFOCUS based course;Mental health nurses inpatient unit;5;20;270;51	9;Y;42	9;39	7;Y;15	60;2
